# Supplementary material
Source: Springer Nature journal article supplement (https://www.springermedizin.de/resource/supplementary/12937_2011_412_MOESM1_ESM.pdf/25653326)
Supplement: MOESM1 [file 25653326]

Run-in period

Treatment period

Regular Salt group

Smart Salt group

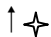

-4 week

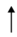

-2 week

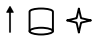

0 week

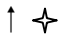

3 week

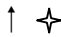

6 week

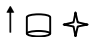

8 week

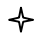

Blood samples

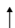

BP and heart rate measurement

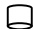

24-h urine collection
